# Supplementary material for: Pregnancy and contraceptive use among women participating in an HIV prevention trial in Tanzania
Source: HighWire-hosted journal article supplement (doi:10.1136/sextrans-2011-050412), 2012-03-21

**Supplemental Figure 1: Pregnancy rates during follow up, (a) by month in all women, and (b) by age group and HIV status**

**(a)**

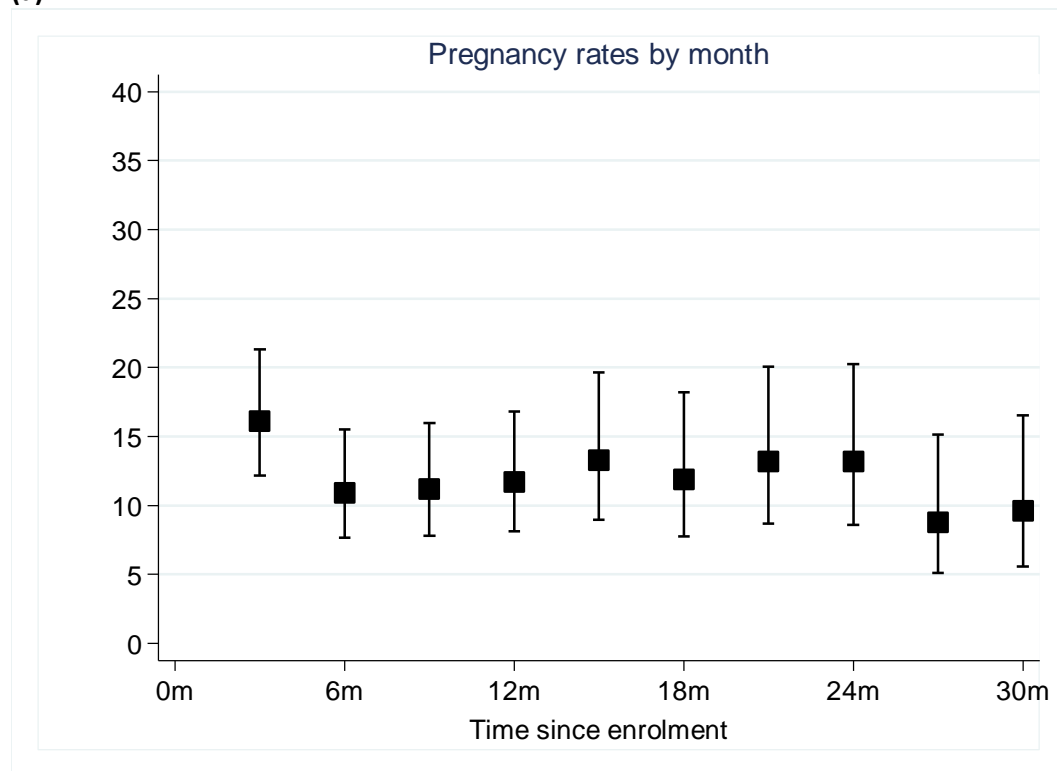

**(b)**

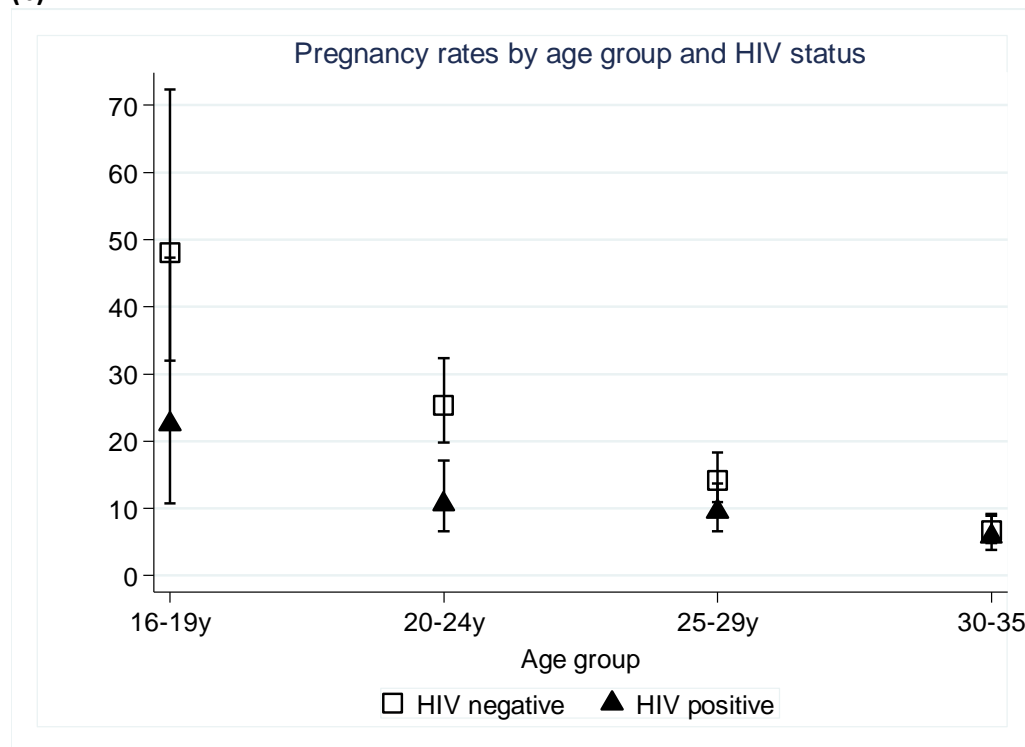

Supplement: sextrans-2011-050412-s1.pdf [file sextrans-2011-050412-s1.pdf]
