# Supplementary material for: Pregnancy and contraceptive use among women participating in an HIV prevention trial in Tanzania
Source: HighWire-hosted journal article supplement (doi:10.1136/sextrans-2011-050412), 2012-03-21

**Supplemental Figure 2. Trends in contraceptive use during follow-up, among women completing at 30 months.**

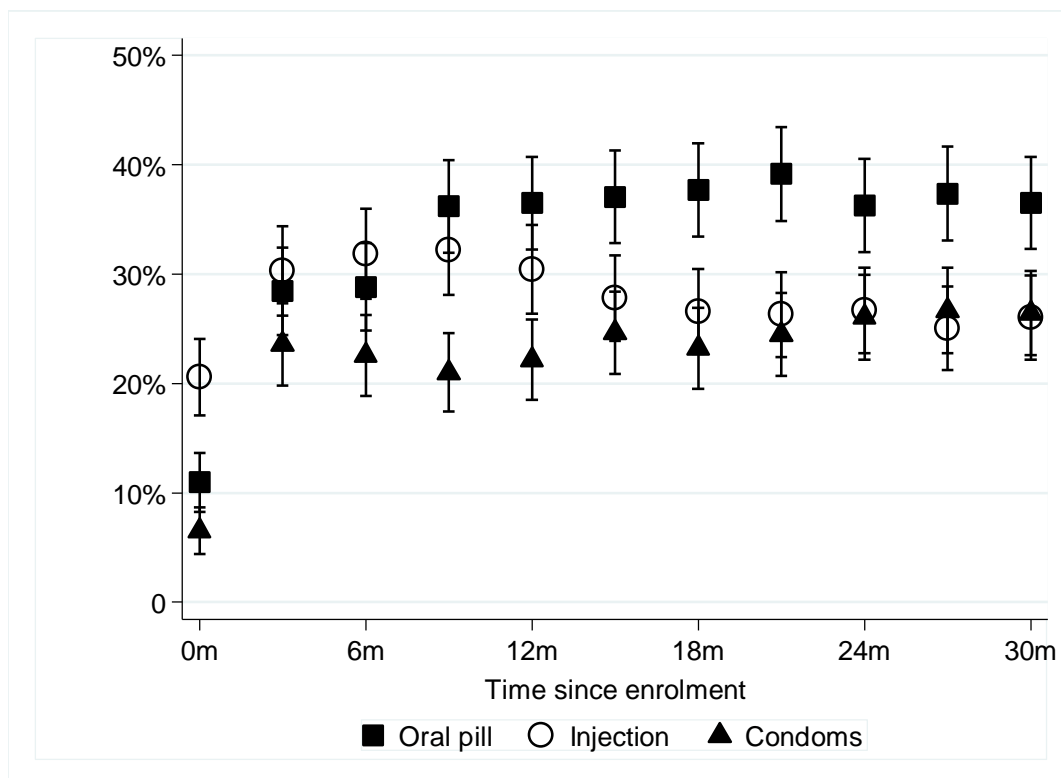

Supplement: sextrans-2011-050412-s2.pdf [file sextrans-2011-050412-s2.pdf]
